# Supplementary material for: A durable heterogeneous catalyst for photoinduced controlled radical polymerization under white LED light irradiation in an aqueous solution
Source: Royal Society of Chemistry journal article supplement (doi:10.1039/d2nj04575c), 2022-01-01
Supplement: d2nj04575c1.pdf [file d2nj04575c1.pdf]

## Supporting Information

### **A durable heterogeneous catalyst for photoinduced controlled radical polymerization under white LED light irradiation in aqueous**

Chenhan Yu,<sup>1,‡</sup> Xinyi Feng,<sup>1,‡</sup> Qiuyu Li,<sup>1</sup> Jiahui Peng,<sup>1</sup> Yu Xiang,<sup>1</sup> Yanting Song,<sup>1</sup>  
Haoyu Feng,<sup>1</sup> Yunye Huang,<sup>1</sup> Longqiang Xiao,<sup>1,2,\*</sup> Linxi Hou<sup>1,2,3,\*</sup>

<sup>1</sup>Department of Materials-Oriented Chemical Engineering, College of Chemical Engineering, Fuzhou University, Fuzhou 350116, P.R. China.

<sup>2</sup>Qingyuan Innovation Laboratory, Fuzhou University, Quanzhou 362801, P. R. China

<sup>3</sup>Fujian Key Laboratory of Advanced Manufacturing Technology of Specialty Chemicals, Fuzhou University, Fuzhou 350116, P.R. China

<sup>‡</sup>These authors contributed equally to this article.

<sup>\*</sup>Corresponding author, E-mail: xiaolq@fzu.edu.cn; lxhou@fzu.edu.cn

Table S1. The elemental analysis result of TD-I.

| Element     | C     | H    | O    | N    | Br   | I     |
|-------------|-------|------|------|------|------|-------|
| Content (%) | 33.58 | 4.35 | 0.00 | 6.38 | 0.00 | 55.69 |

Table S2. Summary data of RCMP of PEGMA.

| Entry | Monomer | DP <sup>a</sup> | m (catalyst) (mg) | <i>t</i> (h) | Conv. (%) <sup>b</sup> | <i>M<sub>n</sub></i> ( <i>M<sub>n,theo</sub></i> <sup>c</sup> ) | <i>M<sub>w</sub></i> / <i>M<sub>n</sub></i> |
|-------|---------|-----------------|-------------------|--------------|------------------------|-----------------------------------------------------------------|---------------------------------------------|
| 1     | PEGMA   | 30              | 0                 | 4            | 6.7                    | 2000 (1000)                                                     | 1.16                                        |
| 2     | PEGMA   | 30              | 5                 | 2            | 8.0                    | 3300 (1300)                                                     | 1.12                                        |
|       |         |                 |                   | 4            | 26.9                   | 4500 (4000)                                                     | 1.12                                        |
|       |         |                 |                   | 6            | 46.0                   | 5900 (6800)                                                     | 1.11                                        |
|       |         |                 |                   | 8            | 58.0                   | 7200 (8500)                                                     | 1.10                                        |
|       |         |                 |                   | 10           | 62.8                   | 7500 (9100)                                                     | 1.14                                        |
|       |         |                 |                   | 12           | 65.7                   | 7900 (9600)                                                     | 1.15                                        |
| 3     | PEGMA   | 30              | 10                | 1            | 14.5                   | 4400 (2300)                                                     | 1.13                                        |
|       |         |                 |                   | 2            | 38.0                   | 6200 (5600)                                                     | 1.11                                        |
|       |         |                 |                   | 4            | 74.8                   | 9000 (10900)                                                    | 1.11                                        |
|       |         |                 |                   | 8            | 90.8                   | 10400 (13100)                                                   | 1.16                                        |
|       |         |                 |                   | 10           | 96.0                   | 11000 (13900)                                                   | 1.17                                        |
|       |         |                 |                   | 12           | 77.5                   | 9600 (11200)                                                    | 1.17                                        |
| 4     | PEGMA   | 30              | 15                | 2            | 24.9                   | 4200 (3700)                                                     | 1.12                                        |
|       |         |                 |                   | 4            | 47.8                   | 6400 (7000)                                                     | 1.09                                        |
|       |         |                 |                   | 6            | 63.0                   | 7900 (9200)                                                     | 1.12                                        |
|       |         |                 |                   | 8            | 70.5                   | 8900 (10200)                                                    | 1.14                                        |
|       |         |                 |                   | 10           | 75.0                   | 9300 (10900)                                                    | 1.16                                        |
|       |         |                 |                   | 12           | 77.5                   | 9600 (11200)                                                    | 1.17                                        |
| 5     | PEGMA   | 50              | 10                | 2            | 37.1                   | 6900 (9000)                                                     | 1.09                                        |
|       |         |                 |                   | 4            | 62.9                   | 10400 (15100)                                                   | 1.10                                        |
|       |         |                 |                   | 6            | 77.7                   | 13000 (18700)                                                   | 1.10                                        |
|       |         |                 |                   | 8            | 84.1                   | 14300 (20200)                                                   | 1.11                                        |
|       |         |                 |                   | 10           | 87.6                   | 15000 (21000)                                                   | 1.12                                        |
|       |         |                 |                   | 12           | 77.5                   | 9600 (11200)                                                    | 1.17                                        |
| 6     | PEGMA   | 100             | 10                | 2            | 19.2                   | 7000 (9300)                                                     | 1.09                                        |
|       |         |                 |                   | 4            | 31.6                   | 10400 (15200)                                                   | 1.11                                        |
|       |         |                 |                   | 6            | 36.1                   | 13000 (17300)                                                   | 1.09                                        |
|       |         |                 |                   | 8            | 39.0                   | 14100 (18700)                                                   | 1.11                                        |
|       |         |                 |                   | 10           | 39.6                   | 14200 (19000)                                                   | 1.12                                        |
|       |         |                 |                   | 12           | 77.5                   | 9600 (11200)                                                    | 1.17                                        |

<sup>a</sup>Target degree of polymerization at 100% monomer conversion (calculated as  $[\text{PEGMA}]_0/[\text{CP-I}]_0$ ).

<sup>b</sup>Monomer conversion was determined by <sup>1</sup>H NMR.

<sup>c</sup> $M_{n,theo} = (\text{molecular weight of monomer}) \times \text{DP} \times (\text{conversion}/100) + (\text{molecular weight of initiator})$ .

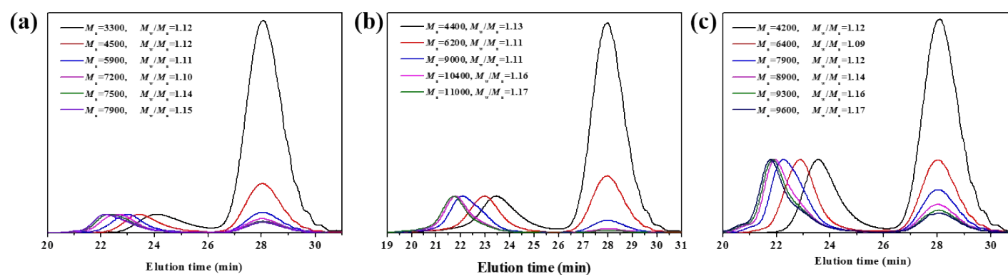

Figure S1. GPC traces of polymers obtained by using 5 mg (a), 10 mg (b) and 15 mg (c) of TD-I for RCMP of PEGMA monomer under white LED light irradiation ( $[\text{PEGMA}]_0/[\text{CP-I}]_0 = 100$ ).

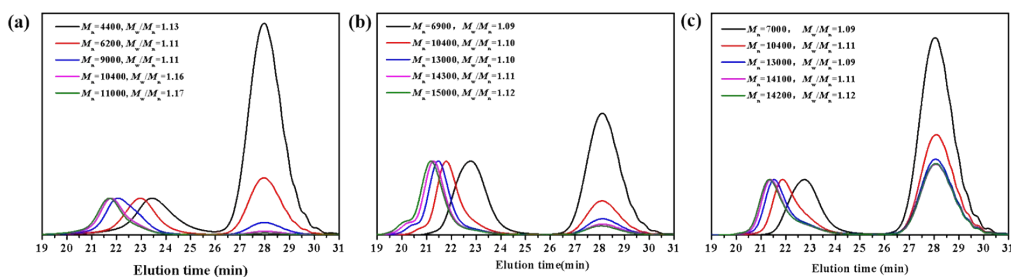

Figure S2. GPC traces of polymers obtained by using 10 mg of TD-I for RCMP of PEGMA monomer under white LED light irradiation  $[\text{PEGMA}]_0/[\text{CP-I}]_0 =$  (a) 30, (b) 50, and (c) 100.
